# Supplementary material
Source: PubMed Central journal article supplement (PMC3878269)
Supplement: NIHMS467346-supplement-Supplementary_Text_and_Figures.pdf [file NIHMS467346-supplement-Supplementary_Text_and_Figures.pdf]

## Supplementary Information

Dissecting differential gene expression within the circadian neuronal circuit of  
*Drosophila*

Emi Nagoshi, Ken Sugino, Ela Kula, Etsuko Okazaki, Taro Tachibana, Sacha Nelson,  
and Michael Rosbash

Table S1. mRNAs enriched in clock cells.

| Rank | Probeset ID  | Symbol                | Fold-change |
|------|--------------|-----------------------|-------------|
| 1    | 1633908_at   | Pdf                   | 3020        |
| 2    | 1628719_at   | cry                   | 266         |
| 3    | 1634188_a_at | tim                   | 220         |
| 4    | 1631468_a_at | tim                   | 85.7        |
| 5    | 1639273_s_at | vri                   | 75.1        |
| 6    | 1641099_a_at | Hr51                  | 65.6        |
| 7    | 1633836_a_at | Fkbp13                | 59.5        |
| 8    | 1627795_at   | Ir                    | 54.1        |
| 9    | 1632706_at   | CG13054               | 47.2        |
| 10   | 1638078_at   | Side                  | 44.9        |
| 11   | 1632873_at   | MtnA                  | 40.8        |
| 12   | 1631948_s_at | Clk                   | 40.6        |
| 13   | 1632734_s_at | bnb                   | 37.0        |
| 14   | 1631722_at   | 1631722_at            | 33.2        |
| 15   | 1638452_at   | per                   | 27.7        |
| 16   | 1631394_at   | CG31324               | 27.6        |
| 17   | 1639281_at   | Fer2                  | 27.5        |
| 18   | 1635900_at   | Thor                  | 23.8        |
| 19   | 1629277_at   | CG31475               | 23.0        |
| 20   | 1634684_at   | CG7272                | 20.7        |
| 21   | 1637772_at   | CG4726                | 18.4        |
| 22   | 1623605_a_at | cbt                   | 18.0        |
| 23   | 1636149_at   | CG31705               | 16.8        |
| 24   | 1624819_s_at | 1624819_s_at          | 15.3        |
| 25   | 1638611_at   | 1638611_at            | 14.8        |
| 26   | 1629399_at   | CG30282               | 14.7        |
| 27   | 1623277_at   | CG17100               | 14.2        |
| 28   | 1631843_at   | CG6749                | 13.2        |
| 29   | 1641270_at   | CG8745                | 12.5        |
| 30   | 1637269_at   | CG6310                | 11.7        |
| 31   | 1635347_a_at | CG8557 /// DmirCG8557 | 10.8        |
| 32   | 1630748_at   | CG32653               | 10.6        |
| 33   | 1626447_at   | CG10508               | 10.3        |
| 34   | 1633480_at   | CG5392                | 10.3        |
| 35   | 1637309_a_at | Cyp12e1               | 10.2        |
| 36   | 1627436_s_at | Pdp1                  | 10.2        |
| 37   | 1641028_at   | CG33988               | 10.0        |
| 38   | 1633144_at   | jbug                  | 9.38        |

|    |              |                                            |      |
|----|--------------|--------------------------------------------|------|
| 39 | 1631534_at   | sfl                                        | 9.02 |
| 40 | 1630614_s_at | 1630614_s_at                               | 8.76 |
| 41 | 1639074_at   | CG33275                                    | 8.72 |
| 42 | 1641361_a_at | Mkp3                                       | 8.52 |
| 43 | 1624405_a_at | CG7059                                     | 6.98 |
| 44 | 1638717_at   | CG10932                                    | 6.97 |
| 45 | 1628865_at   | opa                                        | 6.73 |
| 46 | 1625370_s_at | gem                                        | 6.65 |
| 47 | 1631765_at   | puc                                        | 5.95 |
| 48 | 1627101_at   | scyl                                       | 5.37 |
| 49 | 1631112_at   | 1631112_at                                 | 5.36 |
| 50 | 1636800_at   | 1636800_at                                 | 5.25 |
| 51 | 1639002_s_at | CG14801                                    | 5.20 |
| 52 | 1623594_at   | blow                                       | 5.18 |
| 53 | 1639834_at   | CG14291 /// DpseGA12883<br>/// DvirGJ14185 | 4.84 |
| 54 | 1632712_s_at | CG17836 /// DbuzCG17836                    | 4.45 |
| 55 | 1638563_at   | CG6490                                     | 4.33 |
| 56 | 1633512_at   | toy                                        | 4.29 |
| 57 | 1625145_a_at | Anxb11                                     | 4.14 |
| 58 | 1623133_a_at | CG10508                                    | 4.11 |
| 59 | 1629779_at   | Mcr                                        | 4.02 |
| 60 | 1636193_at   | CG13893                                    | 3.84 |
| 61 | 1635543_at   | 1635543_at                                 | 3.58 |
| 62 | 1640886_a_at | kay                                        | 3.54 |
| 63 | 1633359_a_at | Traf3                                      | 3.53 |
| 64 | 1632129_a_at | syd                                        | 3.43 |
| 65 | 1623931_s_at | CanA-14F                                   | 3.34 |
| 66 | 1624070_at   | RpS9                                       | 3.06 |
| 67 | 1625556_at   | ari-2                                      | 3.02 |
| 68 | 1631728_s_at | PRL-1                                      | 2.98 |
| 69 | 1635491_s_at | TRAM                                       | 2.96 |
| 70 | 1630278_s_at | 1630278_s_at                               | 2.90 |
| 71 | 1637703_a_at | Socs36E                                    | 2.80 |
| 72 | 1629078_s_at | Pk61C                                      | 2.74 |
| 73 | 1630624_s_at | CG10151                                    | 2.73 |
| 74 | 1629641_s_at | 1629641_s_at                               | 2.48 |
| 75 | 1633379_s_at | cnc                                        | 2.46 |
| 76 | 1624168_at   | CG14411                                    | 2.37 |
| 77 | 1632381_at   | dome                                       | 2.32 |
| 78 | 1636406_at   | CG10321                                    | 2.25 |
| 79 | 1627850_at   | CG3689                                     | 2.17 |
| 80 | 1636639_at   | Spp                                        | 2.14 |
| 81 | 1640598_s_at | 1640598_s_at                               | 2.14 |
| 82 | 1626806_at   | tra                                        | 2.10 |
| 83 | 1638476_s_at | mnb                                        | 2.10 |
| 84 | 1639795_at   | CG4558                                     | 2.01 |

---

Table S2. mRNAs enriched in LNvs.

| Rank | Probeset ID  | Symbol                                     | Fold-change |
|------|--------------|--------------------------------------------|-------------|
| 1    | 1633908_at   | Pdf                                        | 3970        |
| 2    | 1628719_at   | cry                                        | 305         |
| 3    | 1634188_a_at | tim                                        | 141         |
| 4    | 1627795_at   | Ir                                         | 123         |
| 5    | 1641099_a_at | Hr51                                       | 123         |
| 6    | 1632706_at   | CG13054                                    | 121         |
| 7    | 1638078_at   | Side                                       | 107         |
| 8    | 1631468_a_at | tim                                        | 95.0        |
| 9    | 1626874_at   | Eip63F-1                                   | 88.4        |
| 10   | 1638452_at   | per                                        | 57.6        |
| 11   | 1640533_at   | CG32406                                    | 52.1        |
| 12   | 1630036_at   | CG13594                                    | 51.9        |
| 13   | 1630454_at   | CG14086                                    | 51.6        |
| 14   | 1626529_at   | CG12977                                    | 51.4        |
| 15   | 1639273_s_at | vri                                        | 48.8        |
| 16   | 1635724_at   | CG14292 /// DpseGA12884<br>/// DvirGJ14186 | 45.7        |
| 17   | 1639281_at   | Fer2                                       | 40.0        |
| 18   | 1629277_at   | CG31475                                    | 36.1        |
| 19   | 1633800_s_at | CG10089                                    | 32.3        |
| 20   | 1633252_at   | CG31714                                    | 30.9        |
| 21   | 1625297_at   | CG8128 /// DmirCG8128                      | 29.0        |
| 22   | 1626727_at   | Mct1                                       | 28.5        |
| 23   | 1631843_at   | CG6749                                     | 26.3        |
| 24   | 1632734_s_at | bnb                                        | 26.0        |
| 25   | 1634256_a_at | stg1                                       | 23.7        |
| 26   | 1640970_at   | CG9313 /// DmirCG9313                      | 22.0        |
| 27   | 1626892_at   | del                                        | 20.1        |
| 28   | 1623714_at   | CG8620                                     | 18.6        |
| 29   | 1626447_at   | CG10508                                    | 17.3        |
| 30   | 1623605_a_at | cbt                                        | 17.0        |
| 31   | 1633480_at   | CG5392                                     | 13.8        |
| 32   | 1630748_at   | CG32653                                    | 13.8        |
| 33   | 1637772_at   | CG4726                                     | 13.7        |
| 34   | 1624405_a_at | CG7059                                     | 13.6        |
| 35   | 1639163_at   | 1639163_at                                 | 13.6        |
| 36   | 1623277_at   | CG17100                                    | 13.4        |
| 37   | 1641028_at   | CG33988                                    | 13.1        |
| 38   | 1628385_a_at | Mef2                                       | 11.2        |
| 39   | 1629688_at   | Oseg4                                      | 10.8        |
| 40   | 1637109_s_at | CG3961                                     | 9.53        |
| 41   | 1628572_s_at | su(rdgB)69                                 | 9.38        |
| 42   | 1637929_a_at | CG32602                                    | 8.56        |
| 43   | 1631250_at   | ind                                        | 8.29        |
| 44   | 1636193_at   | CG13893                                    | 7.96        |
| 45   | 1641091_at   | CG3280                                     | 7.77        |
| 46   | 1633512_at   | toy                                        | 7.42        |
| 47   | 1628476_at   | PP2A-B                                     | 6.83        |
| 48   | 1636648_s_at | 1636648_s_at                               | 6.56        |

|    |              |            |      |
|----|--------------|------------|------|
| 49 | 1639538_at   | 1639538_at | 6.29 |
| 50 | 1640976_at   | I(1)G0155  | 5.46 |
| 51 | 1636365_at   | sick       | 5.09 |
| 52 | 1627511_at   | chrb       | 4.84 |
| 53 | 1632129_a_at | syd        | 3.78 |
| 54 | 1623422_a_at | CG31908    | 3.33 |
| 55 | 1638043_a_at | CG3530     | 3.14 |
| 56 | 1629078_s_at | Pk61C      | 3.14 |
| 57 | 1624928_at   | TORC       | 3.12 |
| 58 | 1626806_at   | tra        | 2.82 |
| 59 | 1638498_s_at | CG1600     | 2.55 |
| 60 | 1636406_at   | CG10321    | 2.40 |
| 61 | 1627850_at   | CG3689     | 2.19 |
| 62 | 1624168_at   | CG14411    | 2.18 |
| 63 | 1640276_a_at | Flo        | 2.15 |

---

Table S3. mRNAs enriched in tim(+)pdf(-)-cells.

| Rank | Probeset ID           | Symbol                                  | Fold-change |
|------|-----------------------|-----------------------------------------|-------------|
| 1    | 1628177_at            | jhamt                                   | 3260        |
| 2    | 1626485_at            | sad                                     | 1820        |
| 3    | 1638601_at            | 1638601_at                              | 1230        |
| 4    | 1627188_at            | phm                                     | 945         |
| 5    | 1631165_at            | CG4688                                  | 933         |
| 6    | 1626857_at            | CG4408                                  | 885         |
| 7    | AFFX-Dm-U43284-1_s_at | AFFX-Dm-U43284-1_s_at                   | 576         |
| 8    | 1626721_at            | CG11762                                 | 574         |
| 9    | 1627946_at            | CG12068                                 | 471         |
| 10   | 1624363_at            | CG15201                                 | 443         |
| 11   | 1624634_at            | CG40050                                 | 401         |
| 12   | 1640529_at            | CG15408                                 | 333         |
| 13   | 1633060_at            | Cyp6g2                                  | 324         |
| 14   | 1623643_s_at          | ldgf3                                   | 236         |
| 15   | 1626503_at            | CG2254                                  | 216         |
| 16   | 1635406_at            | Pkg21D                                  | 195         |
| 17   | 1641538_at            | CG30017                                 | 186         |
| 18   | 1636103_a_at          | nocturnin                               | 174         |
| 19   | 1623996_at            | CG5001                                  | 164         |
| 20   | 1633112_at            | moody                                   | 161         |
| 21   | 1640303_a_at          | pst                                     | 150         |
| 22   | 1632558_at            | 1632558_at                              | 140         |
| 23   | 1630930_a_at          | fus                                     | 139         |
| 24   | 1635389_s_at          | ldgf4                                   | 137         |
| 25   | 1623565_at            | CG17278                                 | 135         |
| 26   | 1630487_s_at          | 1630487_s_at                            | 132         |
| 27   | 1627460_at            | CG18343                                 | 127         |
| 28   | 1623624_at            | CG14869                                 | 123         |
| 29   | 1624272_at            | CHKov1                                  | 113         |
| 30   | 1629121_at            | CG10337                                 | 112         |
| 31   | 1623770_at            | CG1673 /// DpaiCG1673 ///<br>DsimCG1673 | 111         |
| 32   | 1622990_at            | CG5381                                  | 110         |
| 33   | 1637936_at            | CG32512                                 | 107         |
| 34   | 1629906_s_at          | 1629906_s_at                            | 103         |
| 35   | 1627430_at            | CG8888                                  | 102         |
| 36   | 1635390_s_at          | CG9331                                  | 101         |
| 37   | 1640565_at            | PebIII                                  | 95.8        |
| 38   | 1637491_s_at          | CG3835                                  | 95.4        |
| 39   | 1629553_at            | CG14153                                 | 93.1        |
| 40   | 1639276_at            | CG4680                                  | 92.6        |
| 41   | 1630067_a_at          | TepII                                   | 91.7        |
| 42   | 1636158_at            | CG8492                                  | 90.0        |
| 43   | 1632840_s_at          | fus                                     | 89.9        |
| 44   | 1631280_at            | CG9095                                  | 89.6        |
| 45   | 1633893_at            | CG31217                                 | 88.0        |
| 46   | 1638587_at            | tor                                     | 86.9        |
| 47   | 1630038_at            | pyd3                                    | 86.8        |
| 48   | 1625041_at            | Oatp74D                                 | 85.1        |

|    |              |                                                                                                                                                                                              |      |
|----|--------------|----------------------------------------------------------------------------------------------------------------------------------------------------------------------------------------------|------|
| 49 | 1624404_a_at | Sk1                                                                                                                                                                                          | 82.4 |
| 50 | 1626383_at   | CG4096                                                                                                                                                                                       | 81.3 |
| 51 | 1641143_s_at | tsl                                                                                                                                                                                          | 80.1 |
| 52 | 1623244_at   | 1623244_at                                                                                                                                                                                   | 77.8 |
| 53 | 1629265_at   | dib                                                                                                                                                                                          | 75.5 |
| 54 | 1634468_at   | CG13397                                                                                                                                                                                      | 75.2 |
| 55 | 1625791_s_at | 1625791_s_at                                                                                                                                                                                 | 73.5 |
| 56 | 1626417_at   | Cht3                                                                                                                                                                                         | 72.4 |
| 57 | 1634207_at   | CG16799 /// DmirCG16799<br>/// DpseGA14157                                                                                                                                                   | 69.8 |
| 58 | 1634125_at   | CG30440                                                                                                                                                                                      | 69.6 |
| 59 | 1633293_at   | CG10157                                                                                                                                                                                      | 64.7 |
| 60 | 1630642_at   | Pvf2                                                                                                                                                                                         | 63.3 |
| 61 | 1627354_at   | CG11779 /// CG5835 ///<br>DbipCG11779 ///<br>DmeiCG11779 ///<br>DmmmCG11779 ///<br>DmplCG11779 ///<br>DninCG11779 ///<br>DpbpCG11779 ///<br>DpbpCG5835 ///<br>DpspCG11779 ///<br>DvarCG11779 | 60.7 |
| 62 | 1626994_at   | CG33492                                                                                                                                                                                      | 59.0 |
| 63 | 1624503_at   | CG4786                                                                                                                                                                                       | 59.0 |
| 64 | 1626273_at   | CG6232                                                                                                                                                                                       | 57.0 |
| 65 | 1624203_s_at | Gli                                                                                                                                                                                          | 57.0 |
| 66 | 1626275_at   | 1626275_at                                                                                                                                                                                   | 56.8 |
| 67 | 1640747_s_at | CG8547                                                                                                                                                                                       | 55.0 |
| 68 | 1633357_at   | CG7910                                                                                                                                                                                       | 53.5 |
| 69 | 1633998_s_at | 1633998_s_at                                                                                                                                                                                 | 52.9 |
| 70 | 1625071_a_at | Mlc2                                                                                                                                                                                         | 52.2 |
| 71 | 1627872_at   | CG3770                                                                                                                                                                                       | 50.8 |
| 72 | 1629062_at   | CG13252                                                                                                                                                                                      | 50.5 |
| 73 | 1631808_at   | 1631808_at                                                                                                                                                                                   | 50.5 |
| 74 | 1635287_at   | CG15366                                                                                                                                                                                      | 50.4 |
| 75 | 1628729_at   | 1628729_at                                                                                                                                                                                   | 50.2 |
| 76 | 1640989_at   | CG12811                                                                                                                                                                                      | 48.8 |
| 77 | 1626414_at   | Jheh1                                                                                                                                                                                        | 48.2 |
| 78 | 1628252_at   | CG17919                                                                                                                                                                                      | 47.6 |
| 79 | 1640856_at   | CG14755                                                                                                                                                                                      | 47.4 |
| 80 | 1635445_at   | 1635445_at                                                                                                                                                                                   | 46.5 |
| 81 | 1634546_at   | Tig                                                                                                                                                                                          | 46.2 |
| 82 | 1631477_a_at | Sdic1                                                                                                                                                                                        | 45.4 |
| 83 | 1626908_at   | CG8066                                                                                                                                                                                       | 44.9 |
| 84 | 1629963_at   | sut1                                                                                                                                                                                         | 44.2 |
| 85 | 1625736_at   | 1625736_at                                                                                                                                                                                   | 42.8 |
| 86 | 1633944_at   | CG17362                                                                                                                                                                                      | 42.7 |
| 87 | 1637499_s_at | CG5953                                                                                                                                                                                       | 42.3 |
| 88 | 1640448_x_at | 1640448_x_at                                                                                                                                                                                 | 41.7 |
| 89 | 1634666_at   | 1634666_at                                                                                                                                                                                   | 41.3 |
| 90 | 1637077_s_at | CG3777                                                                                                                                                                                       | 40.4 |
| 91 | 1632067_at   | 1632067_at                                                                                                                                                                                   | 40.2 |

|     |              |               |      |
|-----|--------------|---------------|------|
| 92  | 1626138_s_at | Eip63E        | 40.2 |
| 93  | 1632744_a_at | if            | 39.3 |
| 94  | 1623494_at   | ImpE3         | 38.8 |
| 95  | 1623339_at   | CG7498        | 38.4 |
| 96  | 1639396_s_at | CDase         | 38.4 |
| 97  | 1637717_at   | sev           | 38.1 |
| 98  | 1635616_a_at | CG2118        | 36.5 |
| 99  | 1641250_at   | CG14302       | 35.9 |
| 100 | 1632517_at   | CG7966        | 35.5 |
| 101 | 1636168_s_at | CG13101       | 35.1 |
| 102 | 1637535_at   | 1637535_at    | 34.9 |
| 103 | 1636510_a_at | Lsd-1         | 34.4 |
| 104 | 1628428_at   | Fpps          | 34.2 |
| 105 | 1628963_at   | CG4716        | 33.3 |
| 106 | 1638852_at   | CHKov2        | 33.1 |
| 107 | 1637097_at   | CG7497        | 31.8 |
| 108 | 1637662_at   | msta          | 31.6 |
| 109 | 1638345_at   | fog           | 30.6 |
| 110 | 1630741_s_at | PGRP-LB       | 30.1 |
| 111 | 1627266_at   | 1627266_at    | 29.8 |
| 112 | 1640170_at   | CG10311       | 29.0 |
| 113 | 1634507_s_at | CG17549       | 28.7 |
| 114 | 1628296_at   | pgant4        | 28.5 |
| 115 | 1627967_a_at | mthl4         | 28.5 |
| 116 | 1641437_at   | 1641437_at    | 28.4 |
| 117 | 1632204_at   | Mmp1          | 28.4 |
| 118 | 1623552_s_at | CG2893        | 28.2 |
| 119 | 1640817_at   | zormin        | 27.8 |
| 120 | 1640912_s_at | scarface      | 26.8 |
| 121 | 1632964_at   | CG15678       | 26.8 |
| 122 | 1626434_s_at | HMS-Beaglepol | 26.3 |
| 123 | 1624053_at   | CG33967       | 26.3 |
| 124 | 1628682_at   | CG5577        | 25.6 |
| 125 | 1636242_at   | llp6          | 25.5 |
| 126 | 1641210_s_at | 1641210_s_at  | 25.1 |
| 127 | 1635049_at   | CG13877       | 25.0 |
| 128 | 1629893_s_at | 1629893_s_at  | 24.8 |
| 129 | 1631849_at   | heix          | 24.5 |
| 130 | 1624741_at   | CG14464       | 24.3 |
| 131 | 1640703_at   | CG30460       | 22.5 |
| 132 | 1624969_s_at | CG17041       | 21.8 |
| 133 | 1632600_at   | 1632600_at    | 21.5 |
| 134 | 1625637_at   | Start1        | 21.2 |
| 135 | 1632715_at   | 1632715_at    | 21.0 |
| 136 | 1626228_a_at | CG6967        | 21.0 |
| 137 | 1625531_at   | Obp18a        | 20.8 |
| 138 | 1624156_at   | Ugt86Da       | 20.4 |
| 139 | 1636750_s_at | CG13737       | 20.2 |
| 140 | 1633288_at   | CG31763       | 19.9 |
| 141 | 1636780_at   | meso18E       | 19.9 |
| 142 | 1638808_at   | Syx4          | 19.5 |
| 143 | 1633488_at   | aay           | 19.3 |

|     |              |              |      |
|-----|--------------|--------------|------|
| 144 | 1624580_at   | CG9362       | 19.3 |
| 145 | 1626326_at   | CG31436      | 19.3 |
| 146 | 1627070_x_at | CG15040      | 19.2 |
| 147 | 1628224_a_at | E23          | 19.1 |
| 148 | 1626603_at   | zormin       | 18.8 |
| 149 | 1640702_at   | 1640702_at   | 18.4 |
| 150 | 1637534_at   | olf186-F     | 18.4 |
| 151 | 1628611_at   | CG11241      | 18.0 |
| 152 | 1631426_at   | CG32412      | 17.9 |
| 153 | 1632372_at   | CG31076      | 17.1 |
| 154 | 1626856_at   | CG12560      | 17.1 |
| 155 | 1637917_s_at | ttk          | 16.6 |
| 156 | 1634072_s_at | Hmgs         | 16.5 |
| 157 | 1627659_at   | CG32510      | 16.0 |
| 158 | 1633241_at   | CG31340      | 16.0 |
| 159 | 1623094_at   | Tsp42Ei      | 15.8 |
| 160 | 1635126_a_at | 1635126_a_at | 15.3 |
| 161 | 1637672_at   | CG15919      | 15.0 |
| 162 | 1635829_s_at | 1635829_s_at | 14.6 |
| 163 | 1631783_at   | CG4267       | 14.6 |
| 164 | 1625688_at   | CG6293       | 14.5 |
| 165 | 1625891_at   | CG17111      | 14.4 |
| 166 | 1641650_at   | alpha-Est5   | 14.3 |
| 167 | 1637504_at   | CG17754      | 13.9 |
| 168 | 1640200_at   | Dys          | 13.9 |
| 169 | 1641180_a_at | CG33937      | 13.9 |
| 170 | 1629448_at   | CG14358      | 13.9 |
| 171 | 1640581_at   | 1640581_at   | 13.7 |
| 172 | 1628990_at   | Hmgcr        | 13.6 |
| 173 | 1627555_s_at | 1627555_s_at | 13.4 |
| 174 | 1627656_at   | grk          | 13.2 |
| 175 | 1625932_at   | Samuel       | 13.1 |
| 176 | 1636106_s_at | alt          | 12.5 |
| 177 | 1637658_at   | mthl3        | 12.5 |
| 178 | 1629559_s_at | Atet         | 12.2 |
| 179 | 1628712_at   | CG17754      | 12.2 |
| 180 | 1631874_at   | 1631874_at   | 12.1 |
| 181 | 1630430_a_at | CG30437      | 11.8 |
| 182 | 1626301_at   | ldgf3        | 11.3 |
| 183 | 1625643_s_at | 1625643_s_at | 11.0 |
| 184 | 1626453_x_at | 1626453_x_at | 11.0 |
| 185 | 1628052_at   | Cyp6a17      | 11.0 |
| 186 | 1633290_a_at | 1633290_a_at | 10.9 |
| 187 | 1629516_at   | 1629516_at   | 10.8 |
| 188 | 1624017_at   | Ahcy89E      | 10.7 |
| 189 | 1627307_at   | CG5681       | 10.6 |
| 190 | 1622906_at   | 1622906_at   | 10.6 |
| 191 | 1636112_s_at | CG33521      | 10.5 |
| 192 | 1627198_at   | CG33928      | 10.4 |
| 193 | 1632475_at   | msn          | 10.3 |
| 194 | 1630146_at   | CG12508      | 10.2 |
| 195 | 1637971_a_at | CG8129       | 10.2 |



|     |              |                       |      |
|-----|--------------|-----------------------|------|
| 196 | 1630142_at   | sog                   | 10.2 |
| 197 | 1631389_at   | 1631389_at            | 10.1 |
| 198 | 1629047_at   | 1629047_at            | 10.0 |
| 199 | 1626328_at   | CG32259               | 9.79 |
| 200 | 1641351_at   | 1641351_at            | 9.72 |
| 201 | 1637161_s_at | myoglianin            | 9.72 |
| 202 | 1624737_at   | CG31001               | 9.61 |
| 203 | 1636934_at   | zormin                | 9.52 |
| 204 | 1629640_at   | 1629640_at            | 9.46 |
| 205 | 1634580_at   | bsk                   | 9.35 |
| 206 | 1629416_s_at | 1629416_s_at          | 9.13 |
| 207 | 1633760_at   | CG10399               | 8.64 |
| 208 | 1641606_s_at | CG6608                | 8.48 |
| 209 | 1623327_at   | 1623327_at            | 8.46 |
| 210 | 1624067_at   | CG6704                | 8.36 |
| 211 | 1625195_s_at | shn                   | 8.28 |
| 212 | 1635182_at   | wts                   | 8.13 |
| 213 | 1624985_at   | CG7886                | 8.01 |
| 214 | 1625125_at   | CG5599                | 7.72 |
| 215 | 1632390_at   | cer                   | 7.68 |
| 216 | 1626382_s_at | CG13887               | 7.61 |
| 217 | 1641058_at   | CG1319                | 7.57 |
| 218 | 1631390_at   | CG5919                | 7.54 |
| 219 | 1630290_at   | mld                   | 7.49 |
| 220 | 1629323_at   | CG32644               | 7.39 |
| 221 | 1628080_at   | Gllspla2              | 7.13 |
| 222 | 1637805_at   | 1637805_at            | 7.10 |
| 223 | 1631071_s_at | 1631071_s_at          | 7.08 |
| 224 | 1635651_at   | CG30195               | 6.91 |
| 225 | 1641698_at   | CG6429                | 6.87 |
| 226 | 1627122_at   | CG32767               | 6.73 |
| 227 | 1625448_at   | 1625448_at            | 6.55 |
| 228 | 1631266_a_at | CG5840                | 6.51 |
| 229 | 1637345_at   | CG31856               | 6.37 |
| 230 | 1624885_at   | CG32645               | 6.28 |
| 231 | 1622992_at   | twe                   | 6.27 |
| 232 | 1628421_at   | lola                  | 6.09 |
| 233 | 1629747_at   | Cpr49Ag               | 5.87 |
| 234 | 1631058_s_at | Mgstl                 | 5.68 |
| 235 | 1638873_at   | CG6175                | 5.66 |
| 236 | 1638787_at   | CG40207               | 5.62 |
| 237 | 1627925_at   | spict                 | 5.43 |
| 238 | 1638132_at   | CG10184               | 5.31 |
| 239 | 1641680_at   | 1641680_at            | 5.14 |
| 240 | 1639009_at   | CG10962               | 5.13 |
| 241 | 1638768_at   | Cpr11A                | 5.11 |
| 242 | 1637755_at   | CG10987               | 5.11 |
| 243 | 1639147_s_at | CG30438               | 5.06 |
| 244 | 1636400_at   | 1636400_at            | 5.05 |
| 245 | 1625471_s_at | CG4928 /// DsimCG4928 | 5.03 |
| 246 | 1632947_at   | axo                   | 5.00 |
| 247 | 1630726_at   | CG32652               | 4.86 |

|     |              |                     |      |
|-----|--------------|---------------------|------|
| 248 | 1640360_at   | IM2                 | 4.82 |
| 249 | 1633861_at   | CG8145              | 4.76 |
| 250 | 1627126_at   | 1627126_at          | 4.75 |
| 251 | 1628650_at   | CG31538             | 4.71 |
| 252 | 1628266_at   | 1628266_at          | 4.69 |
| 253 | 1626962_x_at | CG32652             | 4.68 |
| 254 | 1639124_at   | CG31283             | 4.67 |
| 255 | 1630279_at   | CG40383             | 4.59 |
| 256 | 1625514_s_at | olf186-F            | 4.56 |
| 257 | 1632368_at   | djl                 | 4.55 |
| 258 | 1628370_at   | 1628370_at          | 4.45 |
| 259 | 1627144_at   | CG10560             | 4.44 |
| 260 | 1623848_a_at | 1623848_a_at        | 4.43 |
| 261 | 1629945_at   | CG32341             | 4.37 |
| 262 | 1633992_at   | CG2137              | 4.36 |
| 263 | 1637432_at   | CG3097              | 4.34 |
| 264 | 1624084_s_at | 1624084_s_at        | 4.26 |
| 265 | 1633146_at   | 1633146_at          | 4.23 |
| 266 | 1634641_a_at | Cyt-b5              | 4.19 |
| 267 | 1635827_s_at | Stat92E             | 4.19 |
| 268 | 1632796_s_at | EcR                 | 4.18 |
| 269 | 1636452_at   | CG14423             | 4.17 |
| 270 | 1633354_at   | Cyp6v1              | 4.13 |
| 271 | 1635565_at   | CG32060             | 4.07 |
| 272 | 1633999_at   | 1633999_at          | 4.05 |
| 273 | 1632490_at   | CG8008              | 4.03 |
| 274 | 1633410_at   | CG2975              | 3.99 |
| 275 | 1626080_at   | 1626080_at          | 3.97 |
| 276 | 1632013_s_at | CG40388 /// CG40390 | 3.97 |
| 277 | 1623783_at   | CG8489              | 3.95 |
| 278 | 1624083_s_at | M(2)21AB            | 3.94 |
| 279 | 1636545_at   | CheB38c             | 3.91 |
| 280 | 1634303_at   | hpo                 | 3.89 |
| 281 | 1638331_s_at | CG31054 /// CG4849  | 3.82 |
| 282 | 1641356_at   | CG33300             | 3.78 |
| 283 | 1634861_at   | CG17177             | 3.77 |
| 284 | 1628454_at   | ppk12               | 3.72 |
| 285 | 1640498_at   | 1640498_at          | 3.59 |
| 286 | 1629642_a_at | CG17664             | 3.57 |
| 287 | 1635524_at   | CG30427             | 3.55 |
| 288 | 1633329_at   | yellow-h            | 3.51 |
| 289 | 1626479_at   | Rapgap1             | 3.46 |
| 290 | 1635104_s_at | CG33936             | 3.45 |
| 291 | 1635733_x_at | CG31439             | 3.44 |
| 292 | 1638228_s_at | 1638228_s_at        | 3.42 |
| 293 | 1637050_at   | CG33054             | 3.41 |
| 294 | 1623963_at   | CG32115             | 3.37 |
| 295 | 1623213_at   | 1623213_at          | 3.33 |
| 296 | 1631657_at   | 1631657_at          | 3.31 |
| 297 | 1625114_at   | Cyp310a1            | 3.28 |
| 298 | 1627662_at   | Ugt35a              | 3.27 |
| 299 | 1625552_at   | CG14820             | 3.25 |

|     |              |                         |      |
|-----|--------------|-------------------------|------|
| 300 | 1631043_x_at | 1631043_x_at            | 3.18 |
| 301 | 1626793_at   | CG30427                 | 3.11 |
| 302 | 1632729_at   | dmrt93B                 | 3.10 |
| 303 | 1625278_s_at | CG31004                 | 3.06 |
| 304 | 1628617_at   | dro4                    | 3.05 |
| 305 | 1635798_a_at | CG17364                 | 3.01 |
| 306 | 1625368_at   | 1625368_at              | 2.99 |
| 307 | 1627168_at   | CG13476                 | 2.96 |
| 308 | 1632428_at   | CG11345                 | 2.90 |
| 309 | 1631316_a_at | CG6262                  | 2.90 |
| 310 | 1638907_at   | 1638907_at              | 2.87 |
| 311 | 1630380_at   | CG3837                  | 2.85 |
| 312 | 1630482_at   | CG4161                  | 2.85 |
| 313 | 1629778_s_at | CG5130                  | 2.84 |
| 314 | 1637310_at   | 1637310_at              | 2.84 |
| 315 | 1632334_at   | 1632334_at              | 2.79 |
| 316 | 1626660_at   | CG15024                 | 2.76 |
| 317 | 1641136_at   | Cpr78Cc                 | 2.73 |
| 318 | 1634366_at   | CG32185                 | 2.69 |
| 319 | 1629038_at   | CG31545                 | 2.64 |
| 320 | 1624373_at   | Crg-1                   | 2.62 |
| 321 | 1632320_at   | CG32080                 | 2.62 |
| 322 | 1636652_a_at | CG14955                 | 2.61 |
| 323 | 1624892_s_at | CG11892 /// DyakCG11892 | 2.60 |
| 324 | 1628730_at   | rdgA                    | 2.59 |
| 325 | 1636058_at   | CG31439                 | 2.58 |
| 326 | 1635503_at   | Vm34Ca                  | 2.54 |
| 327 | 1633804_at   | RhoGDI                  | 2.48 |
| 328 | 1629490_at   | 1629490_at              | 2.46 |
| 329 | 1635989_at   | Hf                      | 2.45 |
| 330 | 1634372_at   | Ddr                     | 2.45 |
| 331 | 1633857_at   | CG13659                 | 2.44 |
| 332 | 1629459_at   | Doc3                    | 2.44 |
| 333 | 1638080_at   | CG13658                 | 2.42 |
| 334 | 1640776_at   | 1640776_at              | 2.34 |
| 335 | 1638513_s_at | atl                     | 2.31 |
| 336 | 1636095_at   | CG4619                  | 2.30 |
| 337 | 1634460_at   | 1634460_at              | 2.24 |
| 338 | 1640322_at   | CG13231                 | 2.24 |
| 339 | 1626226_at   | 1626226_at              | 2.19 |
| 340 | 1635435_at   | CG30278                 | 2.17 |
| 341 | 1627932_at   | how                     | 2.13 |
| 342 | 1639561_at   | 1639561_at              | 2.08 |

---

|                                                    |
|----------------------------------------------------|
| Table S4. Genes tested in the behavioral screening |
| <i>Fkbp13</i>                                      |
| <i>Side</i>                                        |
| <i>MtnA</i>                                        |
| <i>bnb</i>                                         |
| <i>Thor</i>                                        |
| <i>sfl</i>                                         |
| <i>Hr51</i>                                        |
| <i>CG13054</i>                                     |
| <i>CG14086</i>                                     |
| <i>Fer2</i>                                        |
| <i>CG4408</i>                                      |
| <i>nocturnin</i>                                   |

### Supplementary Table Legends

Table S1. mRNAs enriched in “clock cell” groups as compared to elav-labeled generic neurons. 84 mRNAs were found to be enriched more than 2-fold in clock cells ( $p < 0.001$ , FDR=3.4 %).

Table S2. mRNAs enriched in LNvs as compared to tim(+)*pdf*(-)-cells and generic neurons. Microarray data sets from lv- and ad-LNvs were compared to PDF-negative cells (lv-tim(+)*pdf*(-)-cells, lv-elav and ad-elav cells) and ordered by the fold difference. 63 mRNAs were enriched more than 2-fold in LNvs ( $p < 0.0001$ , FDR=0.8 %).

Table S3. mRNAs enriched in tim(+)*pdf*(-)- cells compared to LNvs and generic neurons. Microarray data sets from lv-tim(+)*pdf*(-)-cells were compared to the average of LNvs (lv-LNv, adult s-LNv, adult l-LNv) and generic neurons (lv-elav-cells and ad-elav-cells), and ordered by the fold difference. 342 mRNAs were found to be enriched more than 2-fold

in *tim(+)**pdf(-)* cells ( $p < 0.0001$ , FDR=1.8 %). Note that clock genes were not selected in this list, because this analysis identified the genes preferentially expressed in *tim(+)**pdf(-)* cells over PDF-positive LNvs.

Table S4. Genes tested in the locomotor behavioral screening.

Mutants or RNAis for *Fer2*, *Thor*, and *dnocturnin* showed altered behavioral phenotypes (see text), while others appeared wild-type-like.

Figure S1

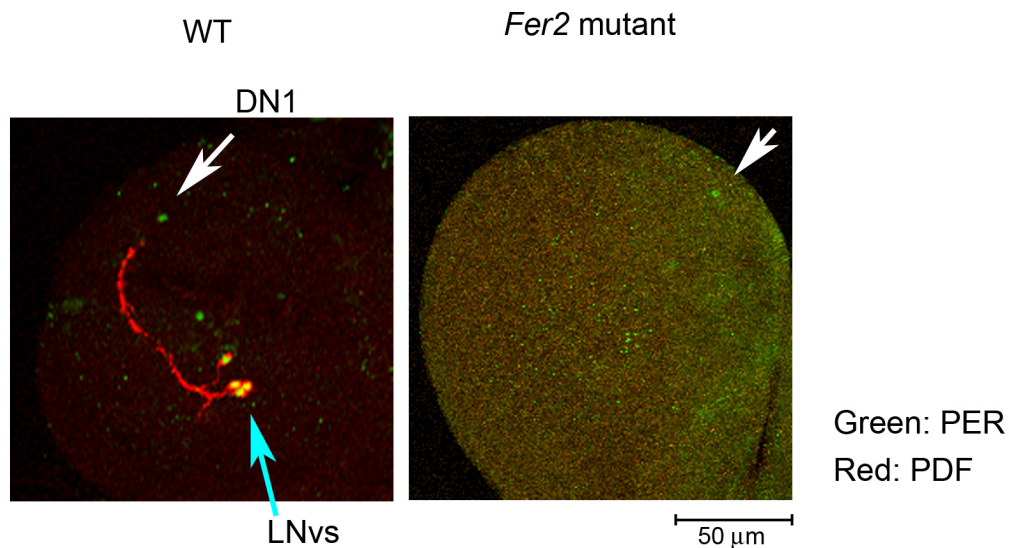

Figure S1. PDF and PER expression in the LNvs is abolished in the *Fer2* mutant larval brain. 3rd instar larvae of wild-type (WT) and homozygous *Fer2* mutant were harvested at ZT0, and the expression of PDF and PER was examined by immunostaining. z-stack projections of confocal images are shown. A minimum of 4 brains were analyzed with similar results.

Figure S2

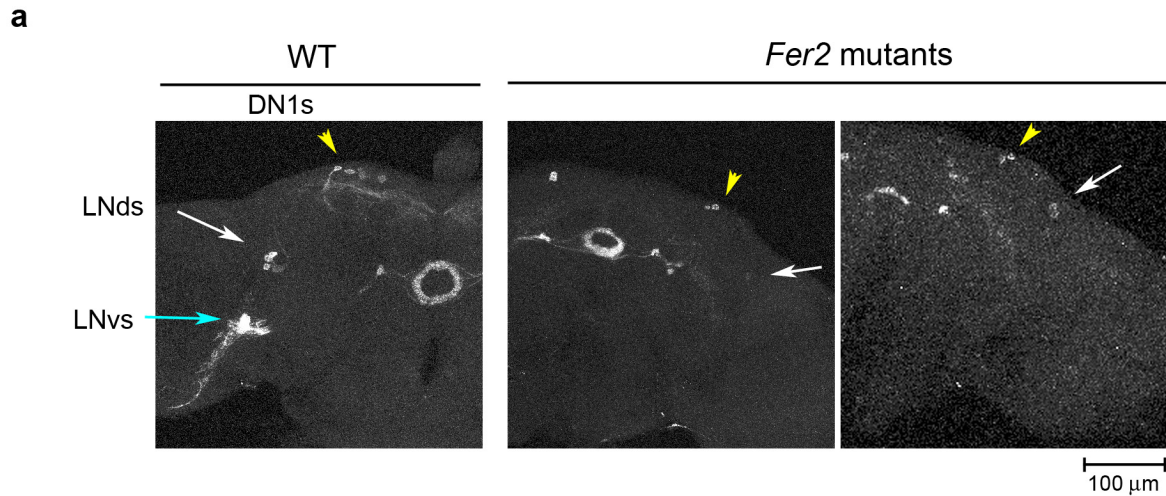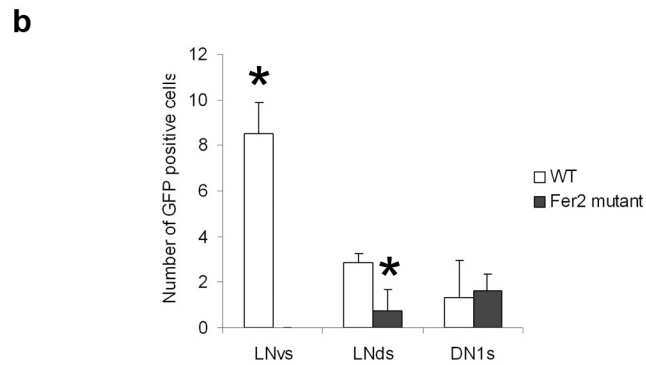

Figure S2. *Cry* expression in Lateral Neurons is impaired in the *Fer2* mutant brain.

a. *UAS-YFP* driven by *cry (39)-GAL4* in wild-type and homozygous *Fer2* mutant brains.

b. The numbers of YFP-labeled cells in wild-type and homozygous *Fer2* mutant brains.

7 WT- and 6 mutant brains were analyzed. The numbers of YFP-labeled LNvs and LNds were significantly reduced in the mutant brains (\* $p < 0.001$ , two-sample t test).

**Figure S3**

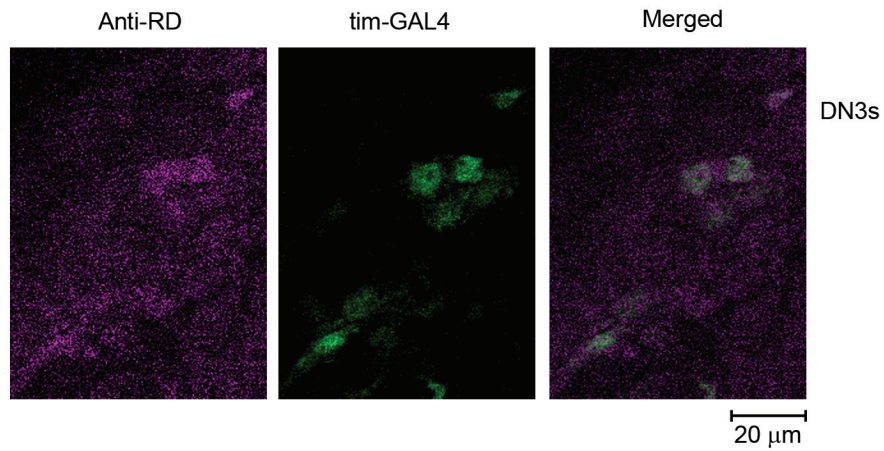

Figure S3. NOC-RD is expressed in a subset of DN3s.

*tim-GAL4*, *UAS-2xEYFP/CyO* flies were entrained in LD for 3 days and harvested at ZT11. The brains were immunostained with anti-NOC-RD antibody and imaged by confocal microscopy.



Figure S4

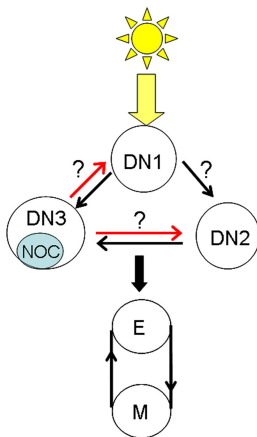

Figure S4. A hypothetical model of the NOC-RD functions in the adult brain. Light input in the early night is processed in the DNs and sets the timing of the master oscillators consisting of M- and E- cells. NOC-RD may be involved in the signaling between DN3s and other clock neurons including DN1s and DN2s (red arrows). The light information ultimately affects M- and E- cells.
